# Supplementary material
Source: PubMed Central journal article supplement (PMC3893061)
Supplement: NIHMS532534-supplement-01.pdf [file NIHMS532534-supplement-01.pdf]

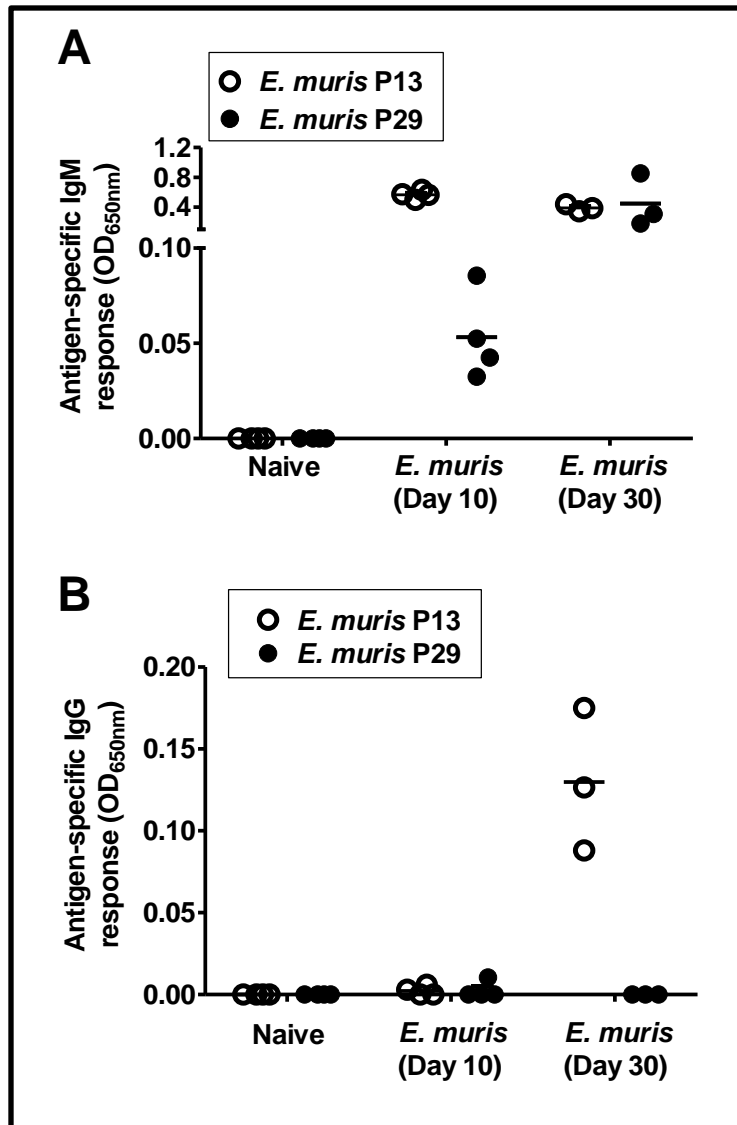

**Figure S1. Development of *E. muris* P29-specific IgG antibodies, but not IgM, is impaired during persistent *E. muris* infection.** We determined concentrations of anti-P29 and anti-P13 antibodies in immune sera from *E. muris* infected mice on days 10 and 30 post-infection. (A) All *E. muris*-infected mice examined had detectable concentrations of serum P13- and P29-specific IgM antibodies on days 10 and 30 post infection. (B) Mice infected with *E. muris* had detectable concentrations of P13-specific IgG, but not P29-specific IgG, antibodies in sera on day 30 post-infection. The horizontal bars represent the mean. n = 4, day 10 post-infection; n= 3, day 30 post-infection

Figure S1
